# Supplementary material for: Effectiveness of Nivolumab in Second-Line and Later in Patients with Advanced Non-Small Cell Lung Cancer in Real-Life Practice in France and Germany: Analysis of the ESME-AMLC and CRISP Cohorts
Source: MDPI journal article supplement (doi:10.3390/cancers14246148), 2022-12-13
Supplement: s1 [file s1]

## Supplementary Material

**Table S1:** Demographics and clinical characteristics of patients with NSCLC treated with nivolumab in 2L+ in ESME-AMLC and CRISP cohort over time (i.e., by year of nivolumab start)

|                         |                            | ESME-AMLC  |            |            |            |           | CRISP      |            |            |           |
|-------------------------|----------------------------|------------|------------|------------|------------|-----------|------------|------------|------------|-----------|
|                         |                            | 2015       | 2016       | 2017       | 2018       | 2019      | 2016       | 2017       | 2018       | 2019      |
| Cohort size             | N                          | 186        | 695        | 856        | 460        | 65        | 42         | 167        | 214        | 93        |
| Age (years)             | Median                     | 61.3       | 63.5       | 63.4       | 64.2       | 67.1      | 64.5       | 65.0       | 65.0       | 67.0      |
|                         | Q1–Q3                      | 54.9–67.4  | 56.7–69.3  | 57.0–69.8  | 58.0–71.3  | 59.0–72.0 | 61.0–74.0  | 59.0–74.0  | 59.0–72.0  | 62.0–74.0 |
|                         | Range                      | 27.8–83.9  | 33.3–91.8  | 32.1–89.5  | 36.1–89.3  | 44.7–85.4 | 42.0–82.0  | 41.0–86.0  | 45.0–86.0  | 46.0–88.0 |
| Sex                     | Male                       | 134 (72.0) | 503 (72.4) | 571 (66.7) | 304 (66.1) | 48 (73.8) | 23 (54.8)  | 107 (64.1) | 135 (63.1) | 60 (64.5) |
| ECOG PS                 | 0–1                        | 84 (45.2)  | 313 (45.0) | 372 (43.4) | 211 (45.9) | 34 (52.3) | 22 (52.4)  | 91 (54.5)  | 122 (57.0) | 56 (60.2) |
|                         | 2                          | 20 (10.7)  | 61 (8.8)   | 106 (12.4) | 52 (11.3)  | 8 (17.4)  | 9 (21.4)   | 37 (22.2)  | 33 (15.4)  | 12 (12.9) |
|                         | 3–4                        | 8 (4.3)    | 19 (2.7)   | 33 (3.8)   | 17 (3.7)   | <5        | <5         | <5         | <5         | 0         |
|                         | Missing                    | 74 (39.8)  | 302 (43.4) | 345 (40.3) | 180 (39.1) | 19 (29.2) | 9 (21.4)   | 35 (21.0)  | 55 (25.7)  | 25 (26.9) |
| Histology               | Adenocarcinoma             | 99 (53.2)  | 432 (62.2) | 549 (64.1) | 324 (70.4) | 50 (76.9) | 25 (59.5)  | 114 (68.3) | 155 (72.4) | 58 (62.4) |
|                         | Large cell carcinoma       | <5         | 19 (2.7)   | 13 (1.5)   | 11 (2.4)   | <5        | <5         | 5 (3.0)    | <5         | <5        |
|                         | Undifferentiated carcinoma | 7 (3.8)    | 15 (2.2)   | 22 (2.6)   | 5 (1.1)    | 0         | NR         | NR         | NR         | NR        |
|                         | Squamous                   | 63 (33.9)  | 184 (26.5) | 213 (24.9) | 95 (20.7)  | 12 (18.5) | 14 (33.3)  | 40 (24.0)  | 48 (22.4)  | 30 (32.3) |
|                         | Others                     | 14 (7.5)   | 45 (6.5)   | 59 (6.9)   | 25 (5.4)   | <5        | <5         | 8 (4.8)    | 10 (4.7)   | <5        |
| At least one metastasis |                            | 169 (90.9) | 638 (91.8) | 775 (90.5) | 412 (89.6) | 58 (89.2) | 42 (100.0) | 163 (97.6) | 204 (95.3) | 92 (98.9) |
| Metastases locations    | Bone metastases            | 91 (48.9)  | 305 (43.9) | 366 (42.8) | 198 (43.0) | 32 (49.2) | 16 (38.1)  | 77 (46.1)  | 100 (46.7) | 41 (44.1) |
|                         | Brain metastases           |            |            |            |            |           | 11 (26.2)  | 40 (24.0)  | 54 (25.2)  | 20 (21.5) |
|                         | - Symptomatic brain met    | 10 (5.4)   | 57 (8.2)   | 80 (9.3)   | 41 (8.9)   | <5        | NR         | NR         | NR         | NR        |

|                                                        |                                       | ESME-AMLC  |            |            |            |           | CRISP     |            |            |           |
|--------------------------------------------------------|---------------------------------------|------------|------------|------------|------------|-----------|-----------|------------|------------|-----------|
| Cohort size                                            | N                                     | 2015       | 2016       | 2017       | 2018       | 2019      | 2016      | 2017       | 2018       | 2019      |
|                                                        |                                       | 186        | 695        | 856        | 460        | 65        | 42        | 167        | 214        | 93        |
|                                                        | - Asymptomatic brain met              | 35 (18.8)  | 168 (24.2) | 237 (27.7) | 133 (28.9) | 20 (30.8) | NR        | NR         | NR         | NR        |
|                                                        | Liver metastases                      | 46 (24.7)  | 170 (24.5) | 193 (22.5) | 90 (19.6)  | 16 (24.6) | 6 (14.3)  | 44 (26.3)  | 57 (26.6)  | 19 (20.4) |
| PD-L1 testing done                                     | Testing done                          | 18 (9.7)   | 110 (15.8) | 234 (27.3) | 266 (57.8) | 50 (76.9) | 12 (28.6) | 72 (43.1)  | 149 (69.6) | 74 (79.6) |
|                                                        | Positive                              | 12 (6.5)   | 48 (6.9)   | 114 (13.3) | 82 (17.8)  | 20 (30.8) | 8 (19.0)  | 34 (20.4)  | 70 (32.7)  | 23 (24.7) |
|                                                        | 1–49%                                 | 6 (3.2)    | 25 (3.6)   | 54 (6.3)   | 57 (12.4)  | 12 (18.5) | <5        | 19 (11.4)  | 55 (25.7)  | 16 (17.2) |
|                                                        | ≥50%                                  | <5         | 27 (3.9)   | 55 (6.4)   | 24 (5.2)   | 6 (9.2)   | <5        | 12 (7.2)   | 11 (5.1)   | <5        |
|                                                        | Unknown expression level              | <5         | 10 (1.4)   | 25 (2.9)   | 15 (15.6)  | 4 (18.2)  | <5        | <5         | <5         | <5        |
|                                                        | Negative                              | 6 (3.2)    | 48 (6.9)   | 100 (11.7) | 170 (37.0) | 28 (43.1) | <5        | 38 (22.8)  | 76 (35.5)  | 51 (58.4) |
|                                                        | Not done                              | 168 (90.3) | 585 (84.2) | 622 (72.7) | 194 (42.2) | 15 (23.1) | 30 (71.4) | 95 (56.9)  | 65 (30.4)  | 19 (20.4) |
| EGFR                                                   | Positive                              | <5         | 16 (2.3)   | 35 (4.1)   | 17 (3.7)   | 7 (10.8)  | <5        | 6 (3.6)    | 8 (3.7)    | 7 (7.5)   |
| ALK                                                    | Positive                              | <5         | 6 (0.9)    | 8 (0.9)    | <5         | <5        | <5        | <5         | 5 (2.3)    | <5        |
| ROS                                                    | Positive                              | 0 (0.0)    | 7 (1.0)    | 5 (0.6)    | <5         | 0         | 0         | <5         | <5         | <5        |
| Time from initial diag. to starting nivolumab (months) | Median                                | 6.3        | 9.3        | 9.8        | 12.0       | 12.2      | 6.1       | 7.1        | 7.2        | 11.3      |
|                                                        | Q1–Q3                                 | 4.8–8.4    | 6.4–13.3   | 6.0–16.7   | 7.5–21.5   | 8.3–22.3  | 3.8–9.0   | 4.8–10.5   | 5.0–11.3   | 7.6–15.9  |
| Line of nivolumab treatment                            | 2L                                    | 140 (75.3) | 460 (66.2) | 568 (66.4) | 308 (67.0) | 40 (61.5) | 35 (83.3) | 145 (86.8) | 178 (83.2) | 73 (78.5) |
|                                                        | 3L                                    | 42 (22.6)  | 167 (24.0) | 218 (25.5) | 111 (24.1) | 16 (24.6) | 7 (16.7)  | 22 (13.2)  | 28 (13.1)  | 16 (17.2) |
|                                                        | 4L                                    | <5         | 49 (7.1)   | 54 (6.3)   | 28 (6.1)   | 7 (10.8)  | 0         | 0          | 5 (2.3)    | <5        |
|                                                        | 5L+                                   | <5         | 19 (2.7)   | 16 (1.9)   | 13 (2.8)   | <5        | 0         | 0          | <5         | 0         |
| Previous regimens                                      | Platinum (PT)-based chemotherapy (CT) | 159 (85.5) | 616 (88.6) | 784 (91.6) | 430 (93.5) | 63 (96.9) | 37 (88.1) | 161 (96.4) | 205 (95.8) | 84 (90.3) |

|                   |                           | ESME-AMLC  |            |            |            |           | CRISP     |            |            |           |
|-------------------|---------------------------|------------|------------|------------|------------|-----------|-----------|------------|------------|-----------|
| Cohort size       | N                         | 2015       | 2016       | 2017       | 2018       | 2019      | 2016      | 2017       | 2018       | 2019      |
|                   |                           | 186        | 695        | 856        | 460        | 65        | 42        | 167        | 214        | 93        |
| received<br>(all) | Non-PT based CT           | 33 (17.7)  | 165 (23.7) | 195 (22.8) | 101 (22.0) | 12 (18.5) | 5 (11.9)  | 10 (6.0)   | 16 (7.5)   | 10 (10.8) |
|                   | EGFR/ALK targeted therapy | 7 (3.8)    | 33 (4.7)   | 51 (6.0)   | 19 (4.1)   | 10 (15.4) | <5        | <5         | 9 (4.2)    | <5        |
|                   | Immunotherapy             | 0          | 0          | <5         | <5         | <5        | <5        | <5         | 5 (2.3)    | 5 (5.4)   |
|                   | Investigational agents    | 16 (8.6)   | 74 (10.6)  | 58 (6.8)   | 21 (4.6)   | 2 (3.1)   | 0         | 0          | <5         | <5        |
|                   | Other combinations        | <5         | 7 (1.0)    | 6 (0.7)    | 6 (1.3)    | 0         | <5        | 10 (6.0)   | 12 (5.6)   | 6 (6.5)   |
| Last LoT          | PT-based CT               | 132 (71.0) | 467 (67.2) | 599 (70.0) | 341 (74.1) | 51 (78.5) | 35 (83.3) | 144 (86.2) | 184 (86.0) | 73 (78.5) |
| regimen           | Non-PT based CT           | 30 (16.1)  | 146 (21.0) | 183 (21.4) | 92 (20.0)  | 10 (15.4) | 5 (11.9)  | 10 (6.0)   | 14 (6.5)   | 9 (9.7)   |
| received          | EGFR/ALK targeted therapy | 7 (3.8)    | 18 (2.6)   | 31 (3.6)   | 7 (1.5)    | <5        | 0         | <5         | <5         | <5        |
| prior to          | Immunotherapy             | 0          | 0          | <5         | <5         | 0         | <5        | <5         | <5         | <5        |
| nivolumab         | Investigational agents    | 16 (8.6)   | 60 (8.6)   | 39 (4.6)   | 14 (3.0)   | <5        | 0         | 0          | <5         | <5        |
|                   | Other combinations        | <5         | <5         | <5         | 5 (1.1)    | 0         | <5        | 9 (5.4)    | 12 (5.6)   | 6 (6.5)   |
| Time from         | Median                    | 3.7        | 5.1        | 5.6        | 6.9        | 6.5       | 3.3       | 5.1        | 5.2        | 7.7       |
| start of          | Q1–Q3                     | 2.3–5.7    | 2.8–8.0    | 2.9–8.9    | 3.7–11.0   | 4.5–9.2   | 2.1–5.8   | 3.0–7.7    | 3.1–7.4    | 5.2–11.8  |
| previous          | <3                        | 70 (37.6)  | 204 (29.4) | 232 (27.1) | 87 (18.9)  | 13 (20.0) | 18 (42.9) | 43 (25.7)  | 51 (23.8)  | 8 (8.6)   |
| LoT until         | ≥3–<6                     | 78 (41.9)  | 214 (30.8) | 227 (26.5) | 116 (25.2) | 14 (21.5) | 14 (33.3) | 57 (34.1)  | 78 (36.4)  | 22 (23.7) |
| start of          | ≥6–<12                    | 38 (20.4)  | 229 (32.9) | 274 (32.0) | 163 (35.4) | 26 (40.0) | 10 (23.8) | 56 (33.5)  | 74 (34.6)  | 42 (45.2) |
| nivolumab         | ≥12                       | 0          | 48 (6.9)   | 123 (14.4) | 94 (20.4)  | 12 (18.5) | 0         | 11 (6.6)   | 10 (4.7)   | 21 (22.6) |
| (months)          |                           |            |            |            |            |           |           |            |            |           |

2L, second-line; 2L+, second-line or later; 3L, third-line; 4L, fourth-line; 5L+, fifth-line or later; *ALK*, anaplastic lymphoma kinase; CI, confidence interval; ECOG PS, Eastern Cooperative Oncology Group performance score; *EGFR*, epidermal growth factor receptor; HR, hazard ratio; LoT, line of therapy; NR, not reported; NSCLC, non-small cell lung cancer; PD-L1, programmed death-ligand 1; PT, platinum; *ROS*, c-ros oncogene.

**Table S2:** Factors associated with overall survival in patients treated with nivolumab in ESME-AMLC

| Risk factor*                                                    | Cohort size | OS     |           | Univariate Cox regression |         | Multivariate Cox regression |         |
|-----------------------------------------------------------------|-------------|--------|-----------|---------------------------|---------|-----------------------------|---------|
|                                                                 |             | Median | 95% CI    | HR (95% CI)               | p-value | HR (95% CI)                 | p-value |
| <b>Age (years)</b>                                              |             |        |           |                           | 0.16    |                             | 0.39    |
| <70                                                             | 1,709       | 12.2   | 10.7–13.9 |                           |         |                             |         |
| 70–74                                                           | 291         | 12.6   | 9.2–14.8  | 1.05 (0.88–1.25)          |         | 1.08 (0.90–1.29)            |         |
| ≥75                                                             | 262         | 9.7    | 7.5–12.6  | 1.18 (0.99–1.41)          |         | 1.12 (0.93–1.34)            |         |
| <b>Sex</b>                                                      |             |        |           |                           | 0.04    |                             | 0.04    |
| Female                                                          | 702         | 13.9   | 11.0–16.0 |                           |         |                             |         |
| Male                                                            | 1,560       | 11.2   | 10.0–12.8 | 1.14 (1.01–1.29)          |         | 1.15 (1.01–1.31)            |         |
| <b>ECOG PS</b>                                                  |             |        |           |                           | <0.01   |                             | <0.01   |
| 0                                                               | 228         | 19.8   | 17.0–27.1 |                           |         |                             |         |
| 1                                                               | 786         | 10.7   | 9.4–12.5  | 1.78 (1.43–2.22)          |         | 1.73 (1.38–2.15)            |         |
| 2+                                                              | 328         | 3.7    | 2.9–4.3   | 3.48 (2.74–4.42)          |         | 3.24 (2.55–4.12)            |         |
| Missing                                                         | 920         | 15.4   | 13.2–18.0 | 1.41 (1.13–1.76)          |         | 1.42 (1.13–1.77)            |         |
| <b>Smoking status</b>                                           |             |        |           |                           | 0.06    |                             | 0.07    |
| Non-smokers                                                     | 138         | 10.7   | 8.0–17.3  |                           |         |                             |         |
| Former smokers                                                  | 1,259       | 10.7   | 9.9–12.4  | 0.95 (0.75–1.20)          |         | 0.96 (0.76–1.22)            |         |
| Current smokers                                                 | 804         | 14.7   | 11.6–16.6 | 0.82 (0.64–1.04)          |         | 0.82 (0.64–1.06)            |         |
| Missing                                                         | 61          | 14.6   | 7.6–23.8  | 0.77 (0.50–1.19)          |         | 0.75 (0.48–1.15)            |         |
| <b>Number of comorbidities at inclusion</b>                     |             |        |           |                           | 0.26    |                             |         |
| 0                                                               | 1,283       | 10.7   | 9.6–13.0  |                           |         |                             |         |
| 1                                                               | 691         | 13.2   | 11.6–15.4 | 0.90 (0.79–1.02)          |         |                             |         |
| 2+                                                              | 288         | 12.1   | 9.2–14.8  | 0.99 (0.83–1.18)          |         |                             |         |
| <b>Stage at diagnosis</b>                                       |             |        |           |                           | 0.53    |                             |         |
| I–II                                                            | 176         | 10.9   | 8.7–15.2  |                           |         |                             |         |
| III                                                             | 507         | 13.4   | 11.2–16.0 | 0.95 (0.74–1.22)          |         |                             |         |
| IV                                                              | 1,550       | 11.1   | 10.0–13.0 | 1.04 (0.83–1.31)          |         |                             |         |
| Missing                                                         | 29          | 16.6   | 3.2– NE   | 0.86 (0.50–1.49)          |         |                             |         |
| <b>PD-L1 expression</b>                                         |             |        |           |                           | 0.49    |                             |         |
| Positive                                                        | 276         | 13.0   | 9.4–18.4  |                           |         |                             |         |
| Negative                                                        | 352         | 10.8   | 8.4–15.8  | 1.14 (0.91–1.43)          |         |                             |         |
| Unknown                                                         | 1,634       | 12.0   | 10.6–13.3 | 1.06 (0.88–1.27)          |         |                             |         |
| <b>Year of nivolumab start</b>                                  |             |        |           |                           | 0.68    |                             |         |
| 2015                                                            | 186         | 9.9    | 7.0–14.9  |                           |         |                             |         |
| 2016                                                            | 856         | 12.1   | 10.4–14.3 | 0.93 (0.76–1.14)          |         |                             |         |
| 2017                                                            | 460         | 11.6   | 9.7– NE   | 0.94 (0.74–1.19)          |         |                             |         |
| 2018                                                            | 695         | 12.5   | 10.0–13.9 | 0.96 (0.79–1.18)          |         |                             |         |
| 2019                                                            | 65          | NR     | NE – NE   | 0.60 (0.29–1.23)          |         |                             |         |
| <b>Histology</b>                                                |             |        |           |                           | 0.32    |                             |         |
| Squamous                                                        | 567         | 10.5   | 9.6–12.5  |                           |         |                             |         |
| All others                                                      | 1,695       | 12.6   | 10.8–14.2 | 0.94 (0.82–1.07)          |         |                             |         |
| <b>Metastases</b>                                               |             |        |           |                           | 0.04    |                             | 0.05    |
| Brain metastases                                                | 785         | 13.0   | 11.0–15.1 |                           |         |                             |         |
| Other metastases only                                           | 1,267       | 10.5   | 9.2–12.5  | 1.12 (0.99–1.27)          |         | 1.07 (0.94–1.22)            |         |
| No metastases                                                   | 210         | 14.5   | 12.0–17.3 | 0.89 (0.72–1.11)          |         | 0.84 (0.67–1.04)            |         |
| <b>Treatment line</b>                                           |             |        |           |                           | 0.11    |                             | 0.49    |
| 2                                                               | 1,516       | 13.2   | 11.2–14.5 |                           |         |                             |         |
| 3+                                                              | 746         | 10.4   | 9.0–12.2  | 1.10 (0.98–1.24)          |         | 0.96 (0.84–1.09)            |         |
| <b>Time from start of previous LoT until start of nivolumab</b> |             |        |           |                           | <0.01   |                             | <0.01   |
| <3 months                                                       | 606         | 7.0    | 6.0–8.3   |                           |         |                             |         |
| ≥3–<6 months                                                    | 649         | 9.8    | 8.4–11.6  | 0.85 (0.74–0.98)          |         | 0.86 (0.75–1.00)            |         |
| ≥6–<12 months                                                   | 730         | 15.4   | 14.0–18.5 | 0.60 (0.52–0.70)          |         | 0.61 (0.53–0.71)            |         |
| ≥12 months                                                      | 277         | 23.8   | 18.0–28.0 | 0.41 (0.33–0.52)          |         | 0.44 (0.35–0.55)            |         |
| <b>Autoimmune disease</b>                                       |             |        |           |                           | 0.58    |                             |         |
| No (Ref)                                                        | 2,209       | 12.1   | 10.7–13.3 |                           |         |                             |         |
| Yes                                                             | 53          | 9.2    | 5.5–16.2  | 1.11 (0.77–1.60)          |         |                             |         |
| <b>EGFR, ALK or ROS mutations</b>                               |             |        |           |                           | 0.56    |                             |         |
| No (Ref)                                                        | 2,154       | 12.2   | 10.7–13.3 |                           |         |                             |         |
| Yes                                                             | 108         | 10.7   | 7.6–16.0  | 1.08 (0.83–1.40)          |         |                             |         |

\*Characteristics at time of nivolumab start if not specified.

ALK, anaplastic lymphoma kinase; BMI, body mass index; CI, confidence interval; ECOG PS, Eastern Cooperative Oncology Group performance score; EGFR, epidermal growth factor receptor; HR, hazard ratio; LoT, line of therapy; OS, overall survival; PD-L1, programmed death-ligand 1; ROS, c-ros oncogene.

**Table S3:** Factors associated with overall survival in patients treated with nivolumab in CRISP

| Variable*                                                       | Cohort size | OS     |          | Univariate Cox regression |         | Multivariate Cox regression |         |
|-----------------------------------------------------------------|-------------|--------|----------|---------------------------|---------|-----------------------------|---------|
|                                                                 |             | Median | 95% CI   | HR (95% CI)               | p-value | HR (95% CI)                 | p-value |
| <b>Age (years)</b>                                              |             |        |          |                           | 0.16    |                             | 0.08    |
| <70                                                             | 328         | 7.3    | 5.4–8.5  | Reference                 |         | Reference                   |         |
| 70–74                                                           | 68          | 8.0    | 5.3–18.9 | 0.72 (0.51–1.01)          |         | 0.71 (0.51–1.01)            |         |
| ≥75                                                             | 126         | 7.8    | 6.1–11.4 | 0.98 (0.76–1.25)          |         | 1.11 (0.86–1.44)            |         |
| <b>Sex</b>                                                      |             |        |          |                           | 0.68    |                             | 0.58    |
| Female                                                          | 195         | 8.0    | 5.8–9.9  | Reference                 |         | Reference                   |         |
| Male                                                            | 327         | 7.4    | 5.8–8.9  | 0.96 (0.77–1.18)          |         | 0.94 (0.75–1.17)            |         |
| <b>ECOG PS</b>                                                  |             |        |          |                           | <0.01   |                             | <0.01   |
| 0                                                               | 68          | 11.8   | 7.9–15.3 | Reference                 |         | Reference                   |         |
| 1                                                               | 225         | 7.8    | 6.2–9.3  | 1.21 (0.86–1.71)          |         | 1.22 (0.86–1.73)            |         |
| 2+                                                              | 102         | 3.9    | 2.5–5.5  | 1.88 (1.29–2.75)          |         | 2.00 (1.36–2.94)            |         |
| Missing                                                         | 127         | 7.6    | 5.3–13.2 | 1.15 (0.79–1.68)          |         | 1.07 (0.73–1.57)            |         |
| <b>BMI</b>                                                      |             |        |          |                           | 0.72    |                             |         |
| Underweight                                                     | 30          | 7.7    | 2.0–19.4 | Reference                 |         |                             |         |
| Normal weight                                                   | 281         | 7.6    | 5.6–11.3 | 0.90 (0.57–1.42)          |         |                             |         |
| Overweight                                                      | 145         | 6.2    | 5.0–8.1  | 1.05 (0.65–1.69)          |         |                             |         |
| Obesity                                                         | 57          | 8.7    | 6.1–12.4 | 0.86 (0.51–1.47)          |         |                             |         |
| Missing                                                         | 9           | 8.8    | 1.0–NA   | 0.81 (0.31–2.17)          |         |                             |         |
| <b>Number of comorbidities at inclusion</b>                     |             |        |          |                           | 0.61    |                             |         |
| 0                                                               | 192         | 7.0    | 4.9–8.7  | Reference                 |         |                             |         |
| 1                                                               | 197         | 8.1    | 6.2–10.9 | 0.89 (0.70–1.13)          |         |                             |         |
| 2+                                                              | 133         | 7.4    | 5.4–12.0 | 0.96 (0.74–1.26)          |         |                             |         |
| <b>Smoking status</b>                                           |             |        |          |                           | 0.99    |                             |         |
| Non-smoker                                                      | 46          | 6.8    | 3.9–17.0 | Reference                 |         |                             |         |
| Former smoker                                                   | 261         | 8.1    | 5.8–11.3 | 0.97 (0.67–1.42)          |         |                             |         |
| Current smoker                                                  | 160         | 7.2    | 5.0–8.1  | 1.01 (0.68–1.51)          |         |                             |         |
| Missing                                                         | 55          | 8.9    | 5.2–12.7 | 0.99 (0.61–1.59)          |         |                             |         |
| <b>Stage at diagnosis</b>                                       |             |        |          |                           | 0.02    |                             | 0.14    |
| I–II                                                            | 18          | 27.3   | 6.9–NA   | Reference                 |         | Reference                   |         |
| III                                                             | 53          | 12.1   | 6.2–18.0 | 1.81 (0.80–4.07)          |         | 2.02 (0.88–4.62)            |         |
| IV                                                              | 428         | 7.2    | 5.5–8.0  | 2.56 (1.21–5.42)          |         | 2.38 (1.12–5.07)            |         |
| Missing                                                         | 23          | 7.2    | 4.8–11.4 | 2.78 (1.13–6.84)          |         | 2.19 (0.88–5.48)            |         |
| <b>PD-L1 expression</b>                                         |             |        |          |                           | 0.1     |                             | <0.01   |
| Positive                                                        | 136         | 10.8   | 5.8–13.3 | Reference                 |         | Reference                   |         |
| Negative                                                        | 170         | 6.1    | 4.6–7.7  | 1.34 (1.01–1.78)          |         | 1.66 (1.24–2.23)            |         |
| Unknown                                                         | 216         | 7.8    | 6.1–8.9  | 1.27 (0.98–1.66)          |         | 1.39 (1.06–1.82)            |         |
| <b>Year of nivolumab start</b>                                  |             |        |          |                           | 0.27    |                             |         |
| 2016                                                            | 42          | 10.4   | 3.4–16.1 | Reference                 |         |                             |         |
| 2017                                                            | 167         | 8.7    | 6.1–12.6 | 0.98 (0.66–1.46)          |         |                             |         |
| 2018                                                            | 214         | 6.1    | 5.1–8.0  | 1.24 (0.84–1.83)          |         |                             |         |
| 2019/2020                                                       | 99          | 7.6    | 6.2–11.3 | 1.05 (0.67–1.64)          |         |                             |         |
| <b>Histology</b>                                                |             |        |          |                           | 0.61    |                             |         |
| Squamous                                                        | 133         | 7.9    | 6.1–11.6 | Reference                 |         |                             |         |
| All others                                                      | 389         | 7.4    | 5.8–8.7  | 1.06 (0.84–1.35)          |         |                             |         |
| <b>Metastases</b>                                               |             |        |          |                           | 0.06    |                             | 0.17    |
| Brain metastases                                                | 128         | 7.1    | 4.1–8.5  | Reference                 |         | Reference                   |         |
| Other metastases only                                           | 379         | 7.6    | 6.2–9.6  | 0.92 (0.72–1.18)          |         | 0.90 (0.70–1.17)            |         |
| No metastases                                                   | 15          | 23.7   | 5.3–NA   | 0.40 (0.18–0.86)          |         | 0.44 (0.19–1.05)            |         |
| <b>Treatment line</b>                                           |             |        |          |                           | 0.64    |                             |         |
| 2                                                               | 433         | 7.7    | 6.3–8.9  | Reference                 |         |                             |         |
| 3+                                                              | 89          | 6.1    | 4.1–11.3 | 1.07 (0.80–1.43)          |         |                             |         |
| <b>Time from start of previous LoT until start of nivolumab</b> |             |        |          |                           | <0.01   |                             | <0.01   |
| <3 months                                                       | 121         | 4.0    | 2.8–6.1  | Reference                 |         | Reference                   |         |
| ≥3–<6 months                                                    | 173         | 6.7    | 5.0–7.9  | 0.79 (0.60–1.03)          |         | 0.75 (0.57–1.00)            |         |
| ≥6–<12 months                                                   | 183         | 10.9   | 7.7–13.4 | 0.60 (0.45–0.78)          |         | 0.57 (0.43–0.75)            |         |
| ≥12 months                                                      | 44          | 12.8   | 6.2–19.7 | 0.48 (0.30–0.75)          |         | 0.48 (0.30–0.77)            |         |

\*Characteristics at time of nivolumab start if not specified.

BMI, body mass index; CI, confidence interval; ECOG PS, Eastern Cooperative Oncology Group performance score; HR, hazard ratio; LoT, line of therapy; OS, overall survival; PD-L1, programmed death-ligand 1.

**Table S4:** Factors associated with treatment duration in patients treated with nivolumab in ESME-AMLC

| Risk factor*                                                    | Cohort size | Treatment duration |         | Univariable Cox regression |         | Multivariable Cox regression |         |
|-----------------------------------------------------------------|-------------|--------------------|---------|----------------------------|---------|------------------------------|---------|
|                                                                 |             | Median             | 95% CI  | HR (95% CI)                | p-value | HR (95% CI)                  | p-value |
| <b>Age (years)</b>                                              |             |                    |         |                            | 0.54    |                              | 0.67    |
| <70                                                             | 1,709       | 2.6                | 2.3–2.8 |                            |         |                              |         |
| 70–74                                                           | 291         | 2.9                | 2.4–3.4 | 1.07 (0.94–1.23)           |         | 1.06 (0.92–1.21)             |         |
| ≥75                                                             | 262         | 2.4                | 2.1–3.1 | 1.05 (0.91–1.21)           |         | 0.98 (0.84–1.14)             |         |
| <b>Sex</b>                                                      |             |                    |         |                            | 0.76    |                              | 0.55    |
| Female                                                          | 702         | 2.5                | 2.3–2.8 |                            |         |                              |         |
| Male                                                            | 1560        | 2.7                | 2.4–2.9 | 1.02 (0.92–1.12)           |         | 1.03 (0.93–1.14)             |         |
| <b>ECOG PS</b>                                                  |             |                    |         |                            | <0.01   |                              | <0.01   |
| 0                                                               | 228         | 3.7                | 2.8–4.7 |                            |         |                              |         |
| 1                                                               | 786         | 2.6                | 2.3–2.9 | 1.21 (1.03–1.42)           |         | 1.18 (1.00–1.39)             |         |
| 2+                                                              | 328         | 1.4                | 1.3–1.8 | 1.94 (1.61–2.33)           |         | 1.87 (1.55–2.25)             |         |
| Missing                                                         | 920         | 3.0                | 2.8–3.3 | 1.11 (0.95–1.30)           |         | 1.12 (0.95–1.31)             |         |
| <b>Smoking status</b>                                           |             |                    |         |                            | 0.06    |                              | 0.16    |
| Non-smokers                                                     | 138         | 2.0                | 1.6–2.4 |                            |         |                              |         |
| Former smokers                                                  | 1,259       | 2.6                | 2.3–2.8 | 0.86 (0.71–1.04)           |         | 0.98 (0.80–1.20)             |         |
| Smokers                                                         | 804         | 2.8                | 2.5–3.2 | 0.78 (0.64–0.95)           |         | 0.88 (0.71–1.09)             |         |
| Missing                                                         | 61          | 2.6                | 1.9–4.0 | 0.78 (0.55–1.10)           |         | 0.84 (0.60–1.19)             |         |
| <b>Number of comorbidities at inclusion</b>                     |             |                    |         |                            | 0.67    |                              |         |
| 0                                                               | 1,283       | 2.4                | 2.3–2.8 |                            |         |                              |         |
| 1                                                               | 691         | 2.9                | 2.5–3.2 | 0.96 (0.87–1.06)           |         |                              |         |
| 2+                                                              | 288         | 2.6                | 2.3–3.2 | 1.01 (0.88–1.16)           |         |                              |         |
| <b>Stage at diagnosis</b>                                       |             |                    |         |                            | 0.62    |                              |         |
| I–II                                                            | 176         | 2.8                | 2.3–3.3 |                            |         |                              |         |
| III                                                             | 507         | 2.8                | 2.4–3.2 | 0.96 (0.79–1.16)           |         |                              |         |
| IV                                                              | 1,550       | 2.5                | 2.3–2.8 | 0.99 (0.83–1.17)           |         |                              |         |
| Missing                                                         | 29          | 2.8                | 1.8–6.0 | 0.75 (0.48–1.18)           |         |                              |         |
| <b>PD-L1 expression</b>                                         |             |                    |         |                            | 0.04    |                              | 0.03    |
| Positive                                                        | 276         | 2.8                | 2.3–3.4 |                            |         |                              |         |
| Negative                                                        | 352         | 2.3                | 1.8–2.7 | 1.19 (1.00–1.42)           |         | 1.24 (1.03–1.48)             |         |
| Unknown                                                         | 1,634       | 2.8                | 2.5–2.9 | 1.01 (0.87–1.16)           |         | 1.04 (0.90–1.20)             |         |
| <b>Year of nivolumab start</b>                                  |             |                    |         |                            | 0.10    |                              | 0.17    |
| 2015                                                            | 186         | 2.2                | 1.9–2.8 |                            |         |                              |         |
| 2016                                                            | 695         | 2.6                | 2.3–3.0 | 0.92 (0.78–1.09)           |         | 0.99 (0.83–1.17)             |         |
| 2017                                                            | 856         | 2.5                | 2.3–2.8 | 0.91 (0.77–1.08)           |         | 1.00 (0.84–1.18)             |         |
| 2018                                                            | 460         | 3.1                | 2.4–3.5 | 0.83 (0.69–1.00)           |         | 0.91 (0.75–1.11)             |         |
| 2019                                                            | 65          | 6.2                | 2.3–NE  | 0.60 (0.39–0.94)           |         | 0.60 (0.38–0.94)             |         |
| <b>Histology</b>                                                |             |                    |         |                            | 0.32    |                              |         |
| Squamous                                                        | 567         | 2.8                | 2.5–3.2 |                            |         |                              |         |
| All others                                                      | 1,695       | 2.5                | 2.3–2.8 | 0.95 (0.86–1.05)           |         |                              |         |
| <b>Metastases</b>                                               |             |                    |         |                            | 0.01    |                              | 0.03    |
| Brain metastases                                                | 785         | 2.5                | 2.3–2.9 |                            |         |                              |         |
| Other metastases only                                           | 1,267       | 2.5                | 2.3–2.8 | 1.10 (0.99–1.21)           |         | 1.07 (0.96–1.18)             |         |
| No metastases                                                   | 210         | 3.5                | 3.0–4.7 | 0.88 (0.74–1.05)           |         | 0.87 (0.73–1.03)             |         |
| <b>Treatment line</b>                                           |             |                    |         |                            | 0.01    |                              | 0.43    |
| 2                                                               | 1,516       | 2.9                | 2.6–3.1 |                            |         |                              |         |
| 3+                                                              | 746         | 2.3                | 2.0–2.5 | 1.13 (1.03–1.25)           |         | 1.04 (0.94–1.15)             |         |
| <b>Time from start of previous LoT until start of nivolumab</b> |             |                    |         |                            | <0.01   |                              | <0.01   |
| <3 months                                                       | 606         | 1.9                | 1.8–2.3 |                            |         |                              |         |
| ≥3–<6 months                                                    | 649         | 2.3                | 1.9–2.4 | 0.95 (0.84–1.07)           |         | 0.99 (0.87–1.11)             |         |
| ≥6–<12 months                                                   | 730         | 3.1                | 2.8–3.5 | 0.77 (0.68–0.86)           |         | 0.80 (0.71–0.91)             |         |
| ≥12 months                                                      | 277         | 4.4                | 3.5–5.5 | 0.59 (0.50–0.69)           |         | 0.63 (0.53–0.75)             |         |
| <b>Autoimmune disease</b>                                       |             |                    |         |                            | 0.38    |                              |         |
| No (Ref)                                                        | 2,209       | 2.6                | 2.4–2.8 |                            |         |                              |         |
| Yes                                                             | 53          | 2.6                | 1.8–3.9 | 1.14 (0.85–1.53)           |         |                              |         |
| <b>EGFR, ALK or ROS mutations</b>                               |             |                    |         |                            | <0.01   |                              | <0.01   |
| No (Ref)                                                        | 2154        | 2.7                | 2.5–2.9 |                            |         |                              |         |
| Yes                                                             | 108         | 2.0                | 1.5–2.3 | 1.48 (1.20–1.82)           |         | 1.50 (1.20–1.87)             |         |

\* Characteristics at time of nivolumab start if not specified

ALK, anaplastic lymphoma kinase; BMI, body mass index; CI, confidence interval; ECOG PS, Eastern Cooperative Oncology Group performance score; EGFR, epidermal growth factor receptor; HR, hazard ratio; LoT, line of therapy; PD-L1, programmed death-ligand 1; ROS, c-ros oncogene.

**Table S5:** Factors associated with treatment duration in patients treated with nivolumab in CRISP

| Variable*                                                       | Cohort size | Treatment duration |          | Univariable Cox regression |         | Multivariable Cox regression |         |
|-----------------------------------------------------------------|-------------|--------------------|----------|----------------------------|---------|------------------------------|---------|
|                                                                 |             | Median             | 95% CI   | HR (95% CI)                | p-value | HR (95% CI)                  | p-value |
| <b>Age (years)</b>                                              |             |                    |          |                            | 0.63    |                              | 0.67    |
| <70                                                             | 328         | 2.2                | 1.8–2.5  | Reference                  |         | Reference                    |         |
| 70–74                                                           | 68          | 2.8                | 2.1–3.7  | 0.87 (0.67–1.15)           |         | 0.89 (0.67–1.17)             |         |
| ≥75                                                             | 126         | 2.6                | 2.0–3.2  | 0.97 (0.78–1.20)           |         | 1.01 (0.81–1.27)             |         |
| <b>Sex</b>                                                      |             |                    |          |                            | 0.5     |                              | 0.29    |
| Female                                                          | 195         | 2.3                | 1.8–2.8  | Reference                  |         | Reference                    |         |
| Male                                                            | 327         | 2.3                | 1.9–2.8  | 0.94 (0.78–1.13)           |         | 0.90 (0.74–1.09)             |         |
| <b>ECOG PS</b>                                                  |             |                    |          |                            | 0.13    |                              | 0.03    |
| 0                                                               | 68          | 2.8                | 2.1–3.4  | Reference                  |         | Reference                    |         |
| 1                                                               | 225         | 2.3                | 2.0–2.8  | 1.04 (0.78–1.38)           |         | 1.02 (0.76–1.36)             |         |
| 2+                                                              | 102         | 1.4                | 1.0–2.3  | 1.25 (0.91–1.72)           |         | 1.29 (0.93–1.79)             |         |
| Missing                                                         | 127         | 2.5                | 1.7–3.6  | 0.90 (0.66–1.23)           |         | 0.82 (0.59–1.13)             |         |
| <b>BMI</b>                                                      |             |                    |          |                            | 0.15    |                              | 0.29    |
| Underweight                                                     | 30          | 1.5                | 1.0–3.7  | Reference                  |         | Reference                    |         |
| Normal weight                                                   | 281         | 2.3                | 1.7–2.8  | 1.03 (0.69–1.53)           |         | 1.16 (0.77–1.76)             |         |
| Overweight                                                      | 145         | 2.3                | 1.9–2.8  | 1.18 (0.78–1.78)           |         | 1.36 (0.88–2.10)             |         |
| Obesity                                                         | 57          | 3.5                | 2.1–4.6  | 0.85 (0.53–1.36)           |         | 1.07 (0.65–1.74)             |         |
| Missing                                                         | 9           | 6.0                | 0.6–NA   | 0.51 (0.19–1.31)           |         | 0.72 (0.27–1.93)             |         |
| <b>Number of comorbidities at inclusion</b>                     |             |                    |          |                            | 0.93    |                              |         |
| 0                                                               | 192         | 2.1                | 1.8–2.6  | Reference                  |         |                              |         |
| 1                                                               | 197         | 2.7                | 2.3–3.1  | 0.96 (0.78–1.19)           |         |                              |         |
| 2+                                                              | 133         | 2.3                | 1.4–2.8  | 0.99 (0.79–1.26)           |         |                              |         |
| <b>Stage at diagnosis</b>                                       |             |                    |          |                            | 0.34    |                              |         |
| I–II                                                            | 18          | 4.6                | 2.3–10.2 | Reference                  |         |                              |         |
| III                                                             | 53          | 2.6                | 1.5–3.7  | 1.55 (0.87–2.76)           |         |                              |         |
| IV                                                              | 428         | 2.3                | 1.9–2.6  | 1.59 (0.95–2.66)           |         |                              |         |
| Missing                                                         | 23          | 1.8                | 1.0–3.9  | 1.75 (0.90–3.40)           |         |                              |         |
| <b>PD-L1 expression</b>                                         |             |                    |          |                            | 0.14    |                              | 0.06    |
| Positive                                                        | 136         | 1.9                | 1.5–2.8  | Reference                  |         | Reference                    |         |
| Negative                                                        | 170         | 2.3                | 1.7–2.8  | 1.27 (1.00–1.61)           |         | 1.31 (1.01–1.68)             |         |
| Unknown                                                         | 216         | 2.4                | 2.2–3.2  | 1.20 (0.95–1.51)           |         | 1.29 (1.02–1.64)             |         |
| <b>Year of nivolumab start</b>                                  |             |                    |          |                            | 0.18    |                              | 0.08    |
| 2016                                                            | 42          | 2.3                | 1.0–5.2  | Reference                  |         | Reference                    |         |
| 2017                                                            | 167         | 2.6                | 1.9–3.5  | 1.03 (0.73–1.47)           |         | 1.11 (0.77–1.59)             |         |
| 2018                                                            | 214         | 1.9                | 1.4–2.3  | 1.26 (0.89–1.77)           |         | 1.42 (1.00–2.04)             |         |
| 2019/2020                                                       | 99          | 3.1                | 2.4–3.7  | 1.02 (0.69–1.50)           |         | 1.30 (0.86–1.98)             |         |
| <b>Histology</b>                                                |             |                    |          |                            | 0.98    |                              |         |
| Squamous                                                        | 133         | 2.3                | 1.4–3.1  | Reference                  |         |                              |         |
| All others                                                      | 389         | 2.3                | 2.0–2.8  | 1.00 (0.82–1.23)           |         |                              |         |
| <b>Metastases</b>                                               |             |                    |          |                            | 0.82    |                              |         |
| Brain metastases                                                | 128         | 2.1                | 1.4–2.6  | Reference                  |         |                              |         |
| Other metastases only                                           | 379         | 2.3                | 2.0–2.8  | 1.01 (0.81–1.25)           |         |                              |         |
| No metastases                                                   | 15          | 3.3                | 1.4–7.0  | 0.85 (0.49–1.48)           |         |                              |         |
| <b>Treatment line</b>                                           |             |                    |          |                            | 0.05    |                              | 0.34    |
| 2                                                               | 433         | 2.4                | 2.1–2.8  | Reference                  |         | Reference                    |         |
| 3+                                                              | 89          | 1.9                | 1.4–2.6  | 1.27 (1.00–1.61)           |         | 1.13 (0.88–1.46)             |         |
| <b>Time from start of previous LoT until start of nivolumab</b> |             |                    |          |                            | 0.01    |                              | <0.01   |
| <3 months                                                       | 121         | 1.4                | 1.1–2.1  | Reference                  |         | Reference                    |         |
| ≥3–<6 months                                                    | 173         | 2.1                | 1.4–2.4  | 0.85 (0.67–1.08)           |         | 0.78 (0.61–1.01)             |         |
| ≥6–<12 months                                                   | 183         | 2.8                | 2.3–3.5  | 0.70 (0.55–0.89)           |         | 0.65 (0.50–0.84)             |         |
| ≥12 months                                                      | 44          | 4.6                | 3.2–7.9  | 0.61 (0.42–0.88)           |         | 0.55 (0.37–0.82)             |         |

\*Characteristics at time of nivolumab start if not specified

BMI, body mass index; CI, confidence interval; ECOG PS, Eastern Cooperative Oncology Group performance score; HR, hazard ratio; LoT, line of therapy; PD-L1, programmed death-ligand 1.

Figure S1: Sensitivity analysis for OS by histology in ESME-AMLC

Overall

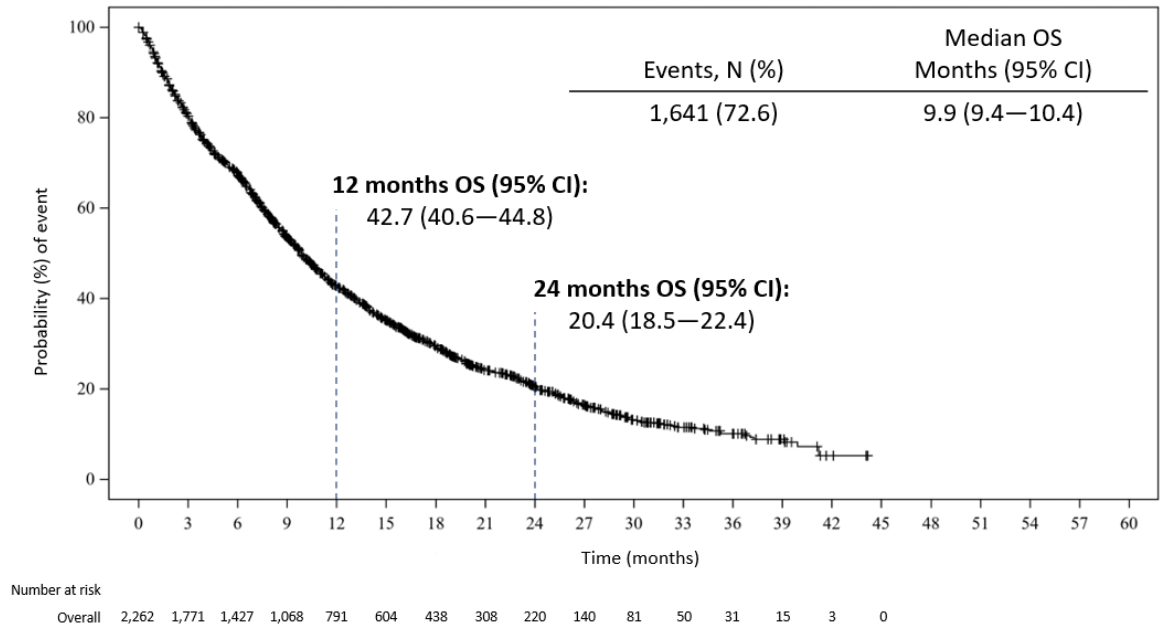

By histology

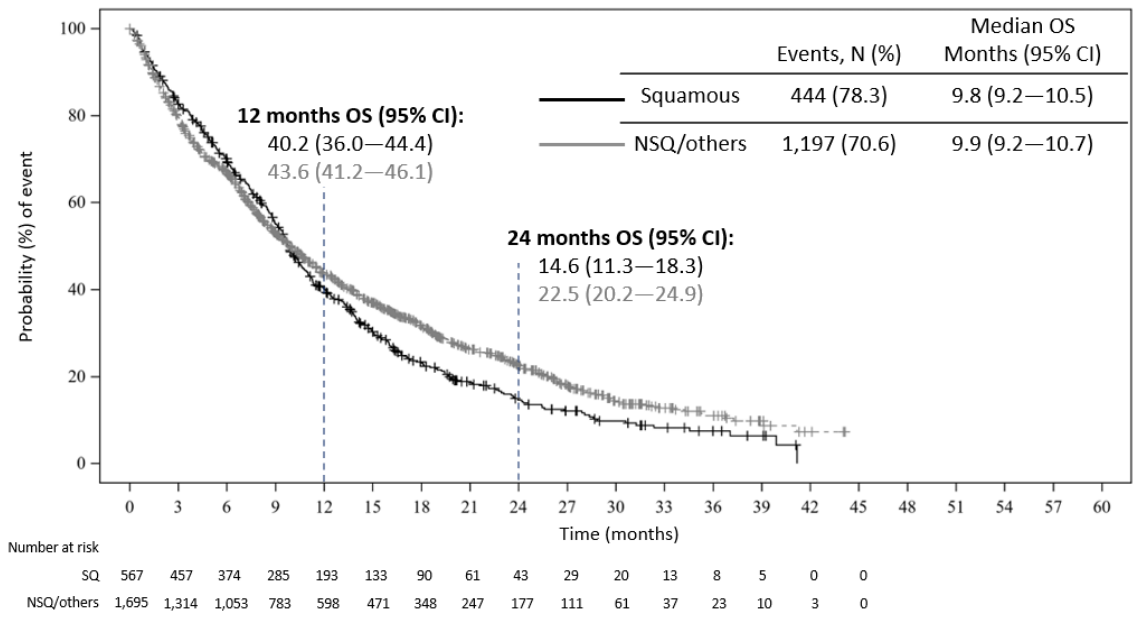

CI, confidence interval; NSQ, non-squamous; OS, overall survival; SQ, squamous.
